# Supplementary material for: High liver fibrosis scores in metabolic dysfunction-associated fatty liver disease patients are associated with adverse atrial remodeling and atrial fibrillation recurrence following catheter ablation
Source: PubMed Central journal article supplement (PMC9471263; doi:10.3389/fendo.2022.957245), 2022-08-31
Supplement: DataSheet_1.pdf [file DataSheet_1.pdf]

## Supplementals

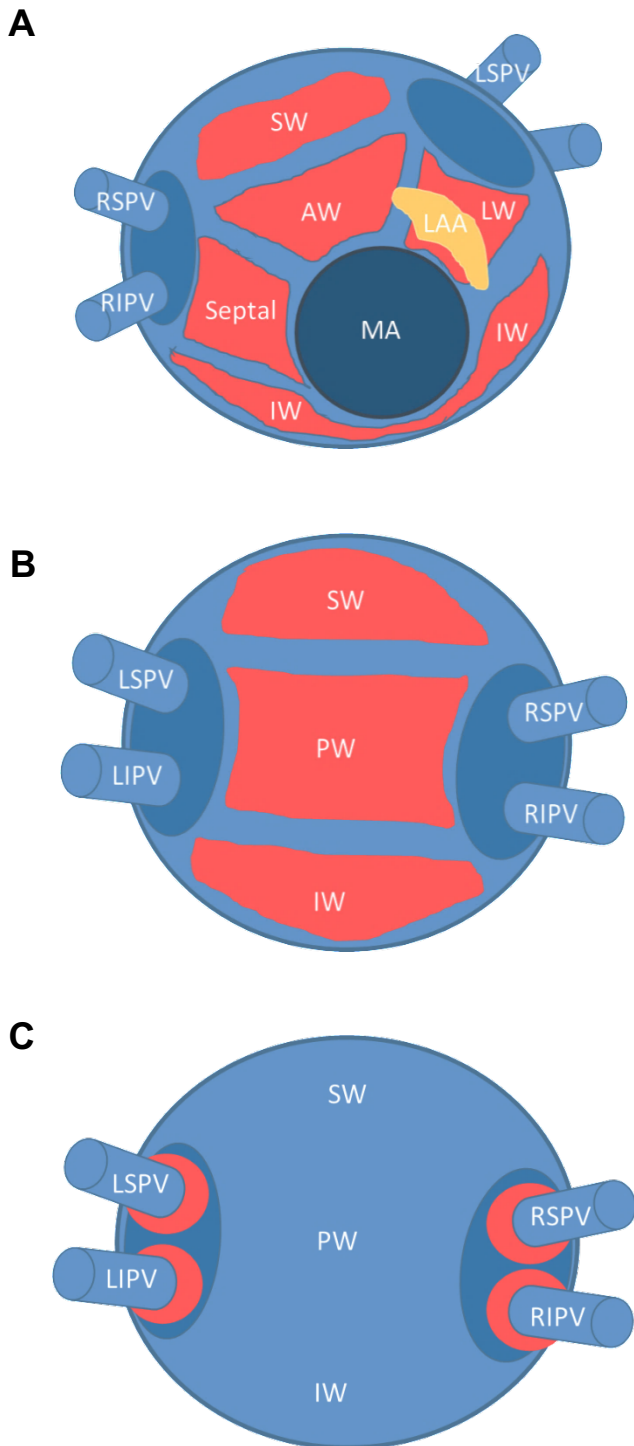

**Figure S1: Assessment of LA bipolar voltage maps. LA segmentation.** (A: Left Anterior Oblique 50° view; B – C: Posterior-Anterior view). MA, mitral annulus; AW, Anterior wall; SW, Superior wall; IW, Inferior wall; LW, Lateral wall; PW, Posterior wall; LSPV, left superior pulmonary vein; LIPV, left inferior pulmonary vein; RSPV, right superior pulmonary vein; RIPV, right inferior pulmonary vein.

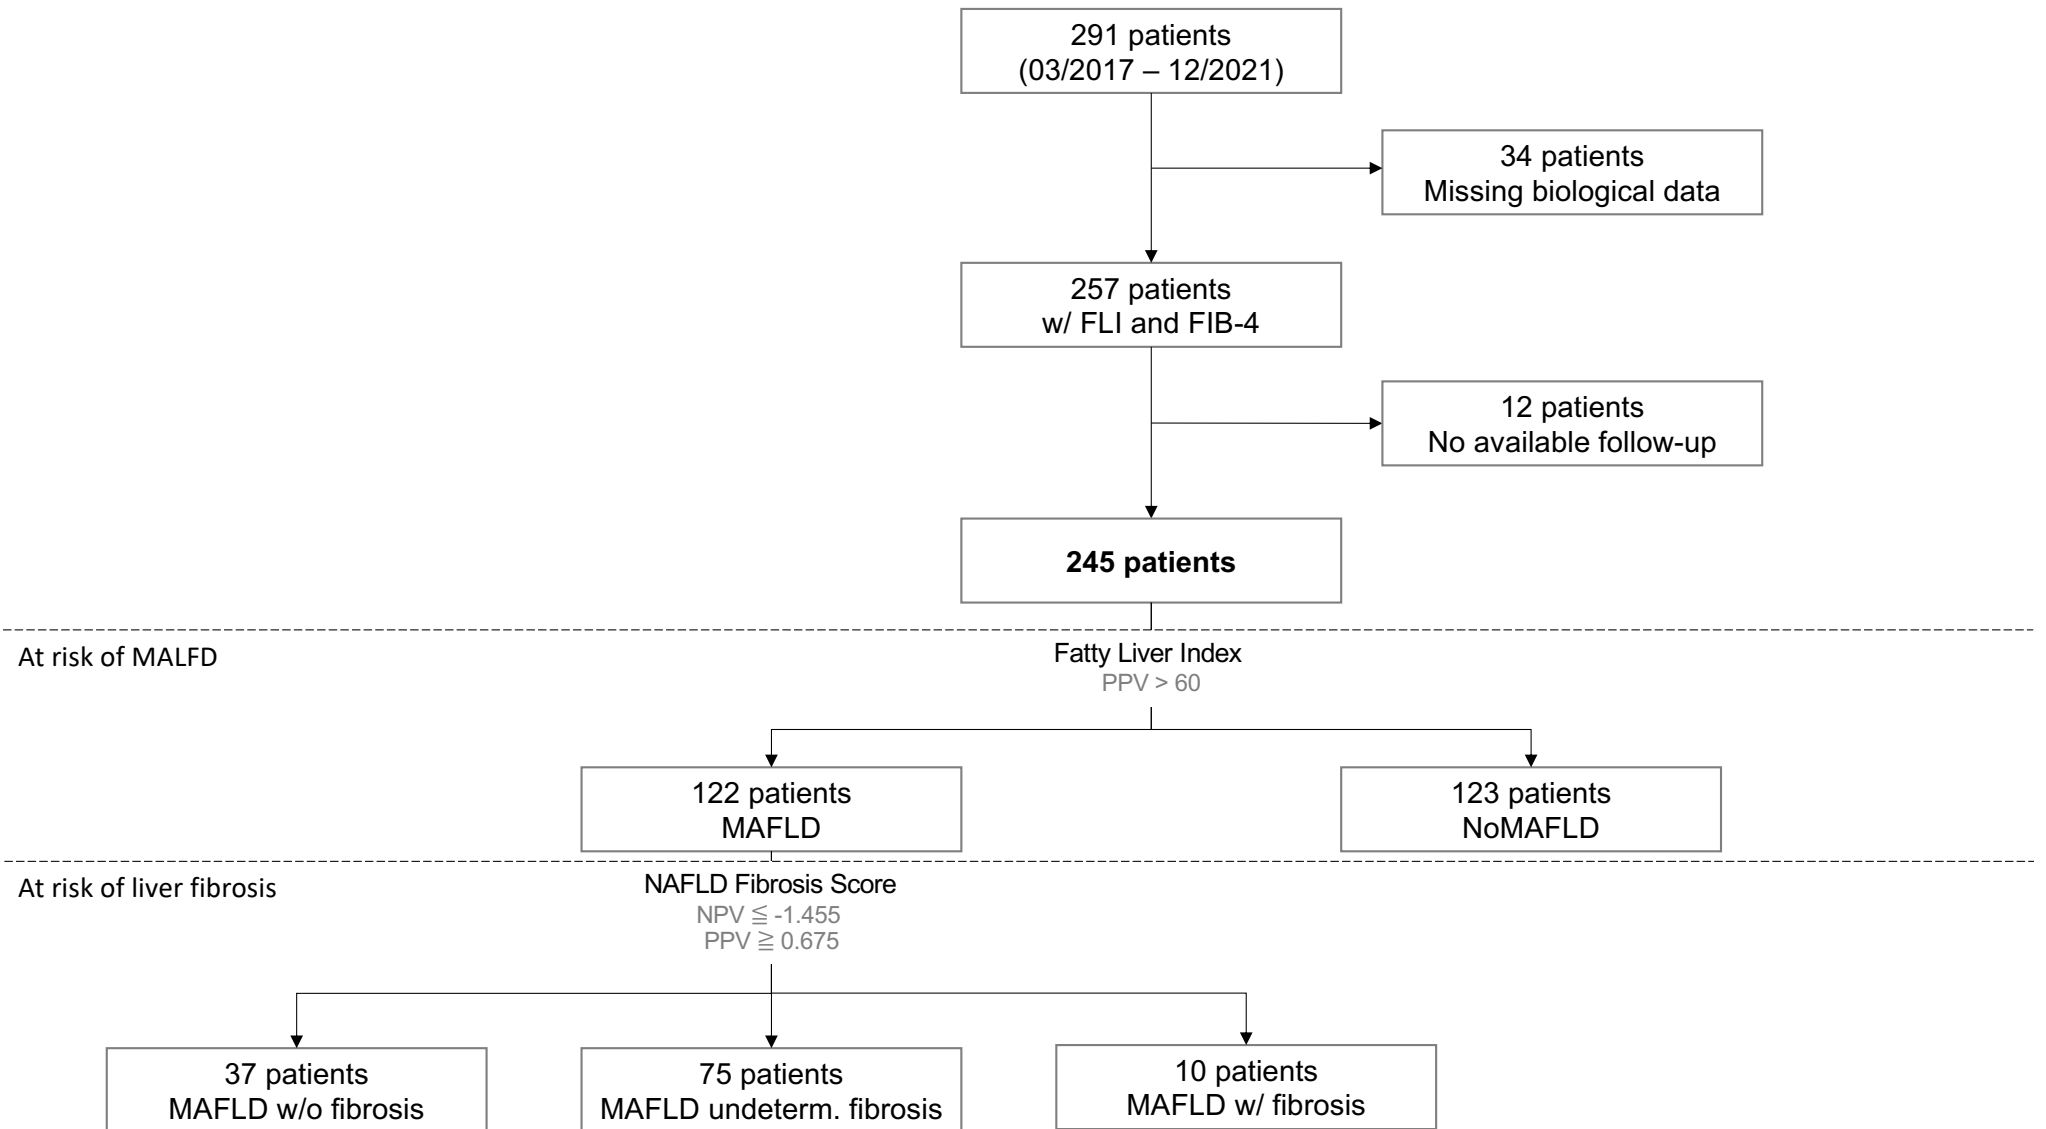

**Table S1: Baseline characteristics of patients referred for heart surgery.**

|                             | NOMAFLD          | MAFLD<br>W/O FIBROSIS | MAFLD<br>W/ SEVERE FIBROSIS |
|-----------------------------|------------------|-----------------------|-----------------------------|
| <i>n</i>                    | 12               | 5                     | 3                           |
| <i>Criteria</i>             | FLI<60           | FLI>60 ; NFS<-1.455   | FLI>60 ; NFS>0.675          |
| <i>Age (years)</i>          | 66.5 [47.3-71.5] | 64.0 [54.0-73.0]      | 62.0 [59.0-75.0]            |
| <i>BMI</i>                  | 26.4 [23.0-28.9] | 29.6 [28.2-33.1]      | 32.8 [31.3-54.9]            |
| <i>HOMA-IR</i>              | 0.58 [0.46-1.19] | 1.03 [0.83-1.60]      | 0.95 [0.43 - 2.46]          |
| <i>SBP (mmHg)</i>           | 137 [125-149]    | 126 [121-139]         | 125 [120-141]               |
| <i>DBP (mmHg)</i>           | 84 [78-92]       | 74 [73-84]            | 73 [63-92]                  |
| <i>LVEF (%)</i>             | 67 [60-73]       | 66 [59-69]            | 63 [60-67]                  |
| <i>LAA (cm<sup>2</sup>)</i> | 24 [22.5-29.5]   | 32 [27-33.5]          | 41 [24-45]                  |
| <i>MVG<sub>i</sub></i>      | 51 [42-58]       | 55 [50-63]            | 59 [51-69]                  |
| <i>AoS, n</i>               | 9                | 4                     | 2                           |
| <i>Mitral, n</i>            | 3                | 1                     | 1                           |

*Abbreviations: BMI=Body mass index ; SBP=Systolic blood pressure ; DBP=Diastolic blood pressure; LVEF=Left ventricular ejection fraction ; LAA=Left atrial area ; AoS=Aortic stenosis.*

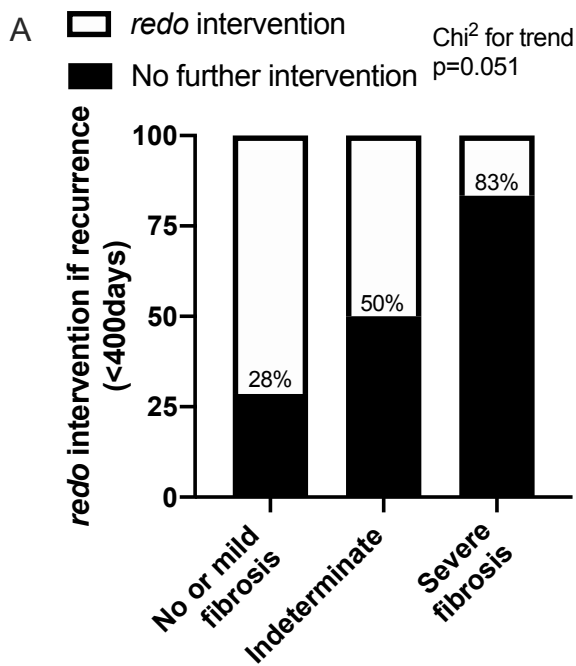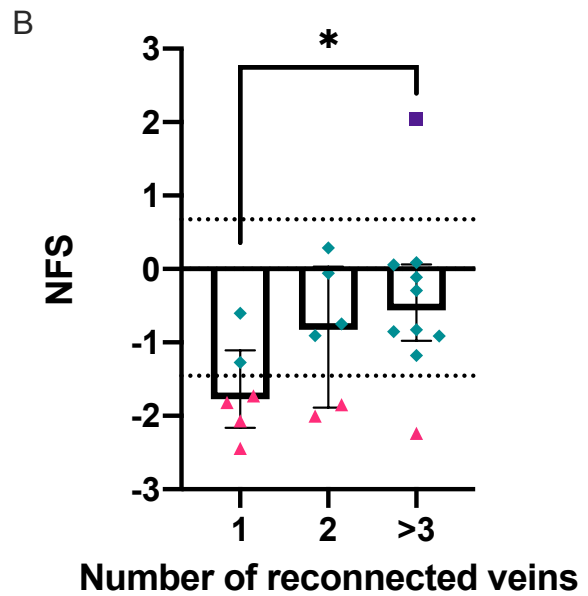

NFS : NAFLD Fibrosis Score
